# Supplementary material for: Prominence of Cu in a plasmonic Cu–Ag alloy decorated SiO2@S-doped C3N4 core–shell nanostructured photocatalyst towards enhanced visible light activity
Source: Royal Society of Chemistry journal article supplement (doi:10.1039/d1na00633a), 2021-11-10
Supplement: d1na00633a1.pdf [file d1na00633a1.pdf]

## Supporting Information

# Prominence of Cu in Plasmonic Cu-Ag alloy Decorated SiO<sub>2</sub>@S-doped C<sub>3</sub>N<sub>4</sub> Core Shell Nanostructured Photocatalyst towards Enhanced Visible Light Activity

Pradeepta Babu<sup>1</sup>, Soumya Ranjan Dash<sup>2</sup>, Arjun Behera<sup>1</sup>

T. Vijayaraghavan<sup>3</sup>, Anuradha Ashok<sup>3</sup> and Kulamani Parida<sup>1\*</sup>

<sup>1</sup>*Centre for Nanoscience and Nanotechnology (CNSNT), Siksha 'O' Anusandhan, Bhubaneswar 751030, India*

<sup>2</sup>*Physical and Material Chemistry Division, CSIR-NCL Pune, Dr. Homi Bhaba Road, Pune 411008, India*

<sup>3</sup>*Functional Materials Laboratory, PSG Institute of Advanced Studies, Coimbatore, 641004, India*

\*Corresponding Author: [kulamaniparida@soa.ac.in](mailto:kulamaniparida@soa.ac.in)&[paridakulamani@yahoo.com](mailto:paridakulamani@yahoo.com).

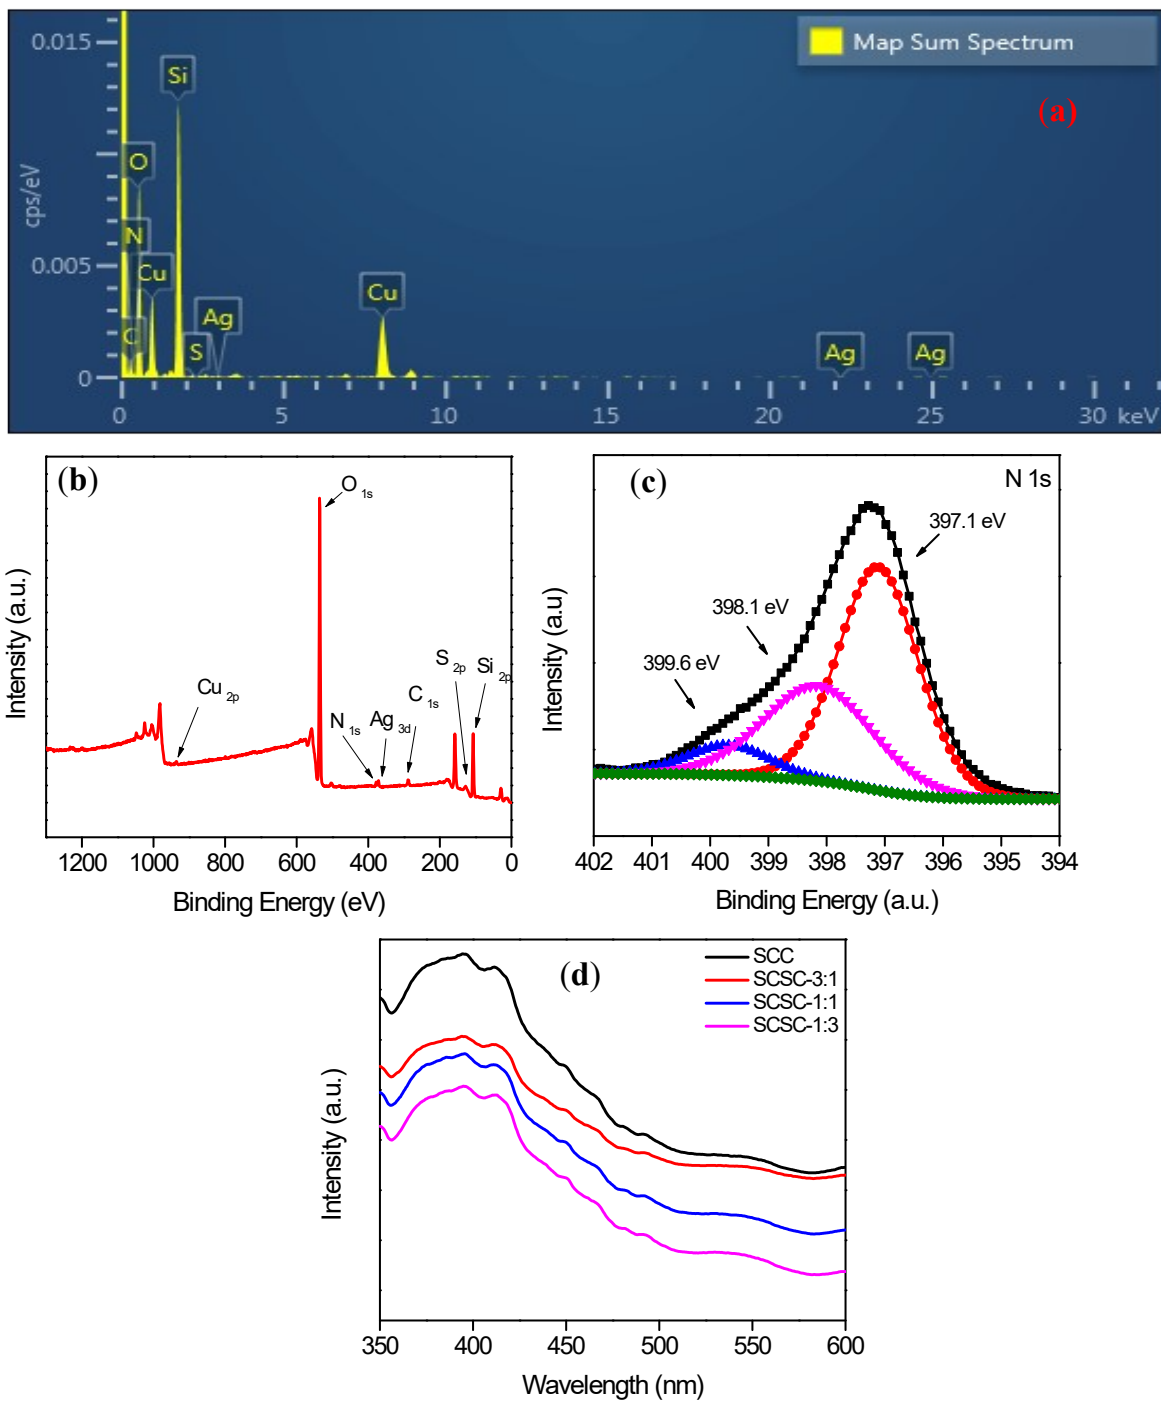

Figure S1. (a) EDX spectra of SCSC-1:3, (b) XPS survey spectrum (c) deconvoluted N 1s spectra (d) Photoluminescence spectra of SCC, SCSC-3:1, SCSC-1:1, SCSC-1:3.

| <b>Photocatalyst</b>                              | <b>Synthesis method</b>              | <b>Activity</b>                                                                                       | <b>Reference</b> |
|---------------------------------------------------|--------------------------------------|-------------------------------------------------------------------------------------------------------|------------------|
| Ag-Cu@TiO <sub>2</sub> microrod                   | Surfactant assisted sol-gel method   | Water disinfection<br>8 h                                                                             | 1                |
| Ag-Cu@ZrO <sub>2</sub>                            | Impregnation reduction method        | Nitro benzene to azoxy benzene<br>75%, 16 h                                                           | 2                |
| Ag-Cu/TiO <sub>2</sub>                            | Wet impregnation method              | H <sub>2</sub> generation<br>16,650 μmol h <sup>-1</sup> g <sup>-1</sup>                              | 3                |
| Ag-Cu alloy                                       | Impregnation reduction method        | 4-Nitro phenol reduction<br>4 min                                                                     | 4                |
| Ag-Cu alloy                                       | Galvanic replacement reaction method | Rhodamine-6g degradation<br>20 min 88%                                                                | 5                |
| Montmorillonite decorated MWCNTs/TiO <sub>2</sub> | sol-gel and wet impregnation method  | 1888 ppm h <sup>-1</sup> of H <sub>2</sub>                                                            | 6                |
| Ni-MMT/TiO <sub>2</sub>                           | sol-gel method                       | 3470 μmole g-cat. <sup>-1</sup> h <sup>-1</sup> of H <sub>2</sub>                                     | 7                |
| SiO <sub>2</sub> @Ag-Cu@CS                        | chemical reduction method            | Hydrogen generation<br>1730 μmol h <sup>-1</sup> g <sup>-1</sup><br>Phenol oxidation<br>81.9%, 90 min | This work        |

Table S1. Literature survey on various Ag-Cu alloy based photocatalyst

| Models                                                                                                                      | $\Delta G_f$ (S=1)              |
|-----------------------------------------------------------------------------------------------------------------------------|---------------------------------|
| Ag <sub>1</sub> Cu <sub>3</sub> _Alter<br>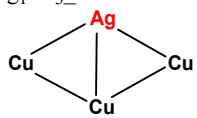 | -92.7<br>kcal/mol               |
| Ag <sub>1</sub> Cu <sub>3</sub><br>        | <b>-95.1</b><br><b>kcal/mol</b> |

| Ag <sub>1</sub> Cu <sub>3</sub> |                    |                    |
|---------------------------------|--------------------|--------------------|
| $\Delta G_f$ (S=1)              | $\Delta G_f$ (S=3) | $\Delta G_f$ (S=5) |
| <b>-95.1</b><br><b>kcal/mol</b> | -78.8<br>kcal/mol  | -10.8<br>kcal/mol  |

Table S2. (Left) Two probable models of Ag<sub>1</sub>Cu<sub>3</sub> with their free energy of formation ( $\Delta G_f$ ) and (Right) Ground state spin multiplicity (S) check for the most stable model (highlighted).

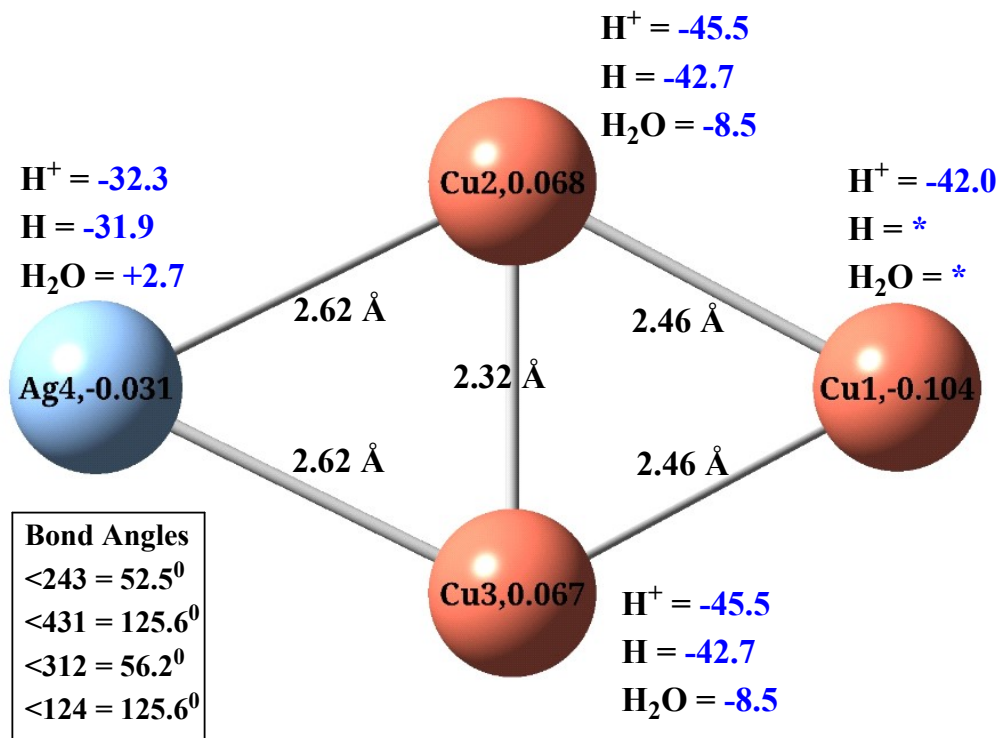

Figure S2. The most stable  $\text{Ag}_1\text{Cu}_3$  optimized model with label, NBO values, and bond parameters. The binding energy ( $\Delta G$ , in kcal/mol) for water and  $\text{H}^+/\text{H}$  at different sites are shown. \*Optimized model for  $\text{H}_2\text{O}$  and  $\text{H}$  bound to Cu1 could not be obtained.

### Optimized Cartesian Coordinates

| Models                                            |    |             |             |             |
|---------------------------------------------------|----|-------------|-------------|-------------|
| $\text{Ag}_1\text{Cu}_3$ _Alter                   | Cu | 2.21996230  | -0.29751054 | 0.00019307  |
|                                                   | Cu | 0.00200260  | -1.31999956 | -0.00022874 |
|                                                   | Cu | -2.21845134 | -0.30077935 | 0.00019315  |
|                                                   | Ag | -0.00216794 | 1.18362541  | -0.00009717 |
| $\text{Ag}_1\text{Cu}_3$                          | Cu | 2.52858158  | -0.00022633 | -0.00040731 |
|                                                   | Cu | 0.35542941  | 1.16078177  | 0.00039167  |
|                                                   | Cu | 0.35485973  | -1.16062738 | 0.00039178  |
|                                                   | Ag | -1.99845214 | 0.00004439  | -0.00023208 |
| $\text{Ag}_1\text{Cu}_3$ _H <sup>+</sup><br>(Cu1) | Cu | 1.21245057  | 1.24370500  | -0.01733171 |
|                                                   | Cu | 0.51078044  | -0.93569508 | -1.19726966 |
|                                                   | Cu | 0.52871753  | -0.90690360 | 1.21102745  |
|                                                   | Ag | -1.43563358 | 0.31657660  | 0.00265116  |
|                                                   | H  | 2.16827060  | 2.48881670  | -0.02096067 |
| $\text{Ag}_1\text{Cu}_3$ _H <sup>+</sup><br>(Cu2) | Cu | 2.24172711  | -1.07335156 | -0.18136026 |
|                                                   | Cu | 0.05369752  | -0.17305177 | 0.44816120  |
|                                                   | Cu | 1.98655502  | 1.23703255  | -0.07816545 |
|                                                   | Ag | -2.61124767 | 0.01507598  | -0.14038396 |
|                                                   | H  | -1.44876927 | -0.43681840 | 1.12761696  |
| $\text{Ag}_1\text{Cu}_3$ _H <sup>+</sup><br>(Cu3) | Cu | -2.24225097 | -1.07277692 | -0.18142497 |
|                                                   | Cu | -1.98551329 | 1.23702400  | -0.07802346 |
|                                                   | Cu | -0.05369825 | -0.17337591 | 0.44807835  |
|                                                   | Ag | 2.61092190  | 0.01495188  | -0.14037084 |
|                                                   | H  | 1.44908354  | -0.43800216 | 1.12716197  |
| $\text{Ag}_1\text{Cu}_3$ _H <sup>+</sup><br>(Ag4) | Cu | 0.87387761  | -0.32218027 | 1.35497036  |
|                                                   | Cu | 0.83711928  | 1.34875310  | -0.40911323 |
|                                                   | Cu | 0.83884787  | -1.02077993 | -0.96830352 |
|                                                   | Ag | -1.50485908 | -0.00355975 | 0.01544855  |
|                                                   | H  | -3.21712103 | -0.00068586 | -0.07513656 |
| $\text{Ag}_1\text{Cu}_3$ _H<br>(Cu2)              | Cu | -2.45583028 | -0.10981486 | 0.00003463  |
|                                                   | Cu | -0.39232456 | 1.29461056  | -0.00003757 |
|                                                   | Cu | -0.34746202 | -1.19712836 | -0.00003251 |
|                                                   | Ag | 1.97356055  | -0.05297529 | 0.00001859  |
|                                                   | H  | -0.08445717 | 2.84748587  | 0.00015399  |

|                                                              |    |             |             |             |
|--------------------------------------------------------------|----|-------------|-------------|-------------|
| Ag <sub>1</sub> Cu <sub>3</sub> _H<br>(Cu3)                  | Cu | 2.45583023  | -0.10981190 | 0.00003776  |
|                                                              | Cu | 0.34746426  | -1.19712851 | -0.00003594 |
|                                                              | Cu | 0.39232160  | 1.29460937  | -0.00003985 |
|                                                              | Ag | -1.97355944 | -0.05297616 | 0.00002033  |
|                                                              | H  | 0.08442722  | 2.84747950  | 0.00014732  |
| Ag <sub>1</sub> Cu <sub>3</sub> _H<br>(Ag4)                  | Cu | -2.58188530 | -0.00627239 | 0.00017448  |
|                                                              | Cu | -0.39107946 | 1.17805095  | -0.00016125 |
|                                                              | Cu | -0.42219706 | -1.15621124 | -0.00016671 |
|                                                              | Ag | 2.01521023  | -0.00523149 | 0.00009193  |
|                                                              | H  | 3.74481171  | -0.20557225 | 0.00013024  |
| Ag <sub>1</sub> Cu <sub>3</sub> _H <sub>2</sub> O<br>(Cu2)   | Cu | 2.48224306  | -0.43797130 | -0.00391374 |
|                                                              | Cu | 0.41587804  | 0.97067946  | -0.03361236 |
|                                                              | Cu | 0.23618434  | -1.36356015 | 0.02336514  |
|                                                              | Ag | -2.03974042 | -0.14462262 | -0.00189448 |
|                                                              | O  | 0.50391326  | 3.01689194  | -0.04295119 |
|                                                              | H  | 1.23962285  | 3.34728485  | 0.50071384  |
|                                                              | H  | -0.29798690 | 3.40955012  | 0.34260411  |
| Ag <sub>1</sub> Cu <sub>3</sub> _H <sub>2</sub> O<br>(Cu3)   | Cu | 2.48200769  | -0.43893296 | -0.00214574 |
|                                                              | Cu | 0.23489512  | -1.36357902 | 0.02325259  |
|                                                              | Cu | 0.41767361  | 0.97043811  | -0.03543715 |
|                                                              | Ag | -2.03992503 | -0.14371077 | -0.00221443 |
|                                                              | O  | 0.48940050  | 3.01681080  | -0.04133851 |
|                                                              | H  | 1.30097687  | 3.35249669  | 0.37642162  |
|                                                              | H  | -0.24242060 | 3.39756521  | 0.47394345  |
| Ag <sub>1</sub> Cu <sub>3</sub> _H <sub>2</sub> O<br>(Ag4)   | Cu | 2.87033351  | -0.00515582 | 0.00178524  |
|                                                              | Cu | 0.66291997  | 1.15583803  | 0.00058301  |
|                                                              | Cu | 0.67125713  | -1.14936818 | -0.00121563 |
|                                                              | Ag | -1.69479492 | 0.00558987  | -0.00222839 |
|                                                              | O  | -4.16872693 | -0.13345876 | -0.00140021 |
|                                                              | H  | -4.46795956 | 0.44370156  | -0.72464322 |
|                                                              | H  | -4.45767151 | 0.32313767  | 0.80715322  |
| Ag <sub>1</sub> Cu <sub>3</sub> _H <sub>2</sub> O<br>(TS_Cu) | Cu | 2.47865031  | -0.53937700 | 0.01018726  |
|                                                              | Cu | -0.02269613 | -1.40023577 | 0.00051899  |
|                                                              | Cu | 0.39050424  | 0.92140602  | -0.03840866 |
|                                                              | Ag | -2.08903576 | 0.10434912  | 0.00939661  |
|                                                              | O  | 1.48504688  | 2.58170143  | -0.06251963 |
|                                                              | H  | 2.16014998  | 1.15232463  | -0.01405635 |
|                                                              | H  | 1.59686154  | 2.81765077  | 0.87594274  |
| Ag <sub>1</sub> Cu <sub>3</sub> _H <sub>2</sub> O<br>(TS_Ag) | Cu | 2.57169720  | -0.08100949 | 0.01267018  |
|                                                              | Cu | 0.53527584  | -1.34026472 | 0.00417181  |
|                                                              | Cu | 0.38328165  | 1.00925157  | -0.03605578 |
|                                                              | Ag | -2.03058033 | -0.31494350 | 0.00373512  |
|                                                              | O  | -0.48287147 | 2.78646681  | -0.05980607 |
|                                                              | H  | -0.57805186 | 3.03085911  | 0.87809516  |
|                                                              | H  | -1.33908636 | 1.42840738  | -0.01799735 |

|                                                                               |    |             |             |             |
|-------------------------------------------------------------------------------|----|-------------|-------------|-------------|
| Ag <sub>1</sub> Cu <sub>3</sub> _H <sub>2</sub> O<br>(Unfavorable<br>Product) | Cu | -0.02782248 | 1.17267576  | 1.19545425  |
|                                                                               | Cu | -0.02786914 | 1.17288853  | -1.19531741 |
|                                                                               | Cu | 1.41549583  | -0.41258752 | -0.00007966 |
|                                                                               | Ag | -1.34222795 | -0.85212917 | -0.00002930 |
|                                                                               | O  | 2.82023800  | -1.60577910 | -0.00004582 |
|                                                                               | H  | 3.64428776  | -1.09235647 | 0.00018828  |
|                                                                               | H  | -2.55580028 | -2.06766620 | -0.00010267 |
| Ag <sub>1</sub> Cu <sub>3</sub> _H <sub>2</sub> O<br>(Final Product)          | Cu | 0.17818690  | 1.52362615  | -0.83970663 |
|                                                                               | Cu | 0.27235314  | 0.59020926  | 1.51139345  |
|                                                                               | Cu | -1.38104414 | -0.38948750 | -0.00337532 |
|                                                                               | Ag | 1.17832789  | -0.95932420 | -0.30863423 |
|                                                                               | O  | -3.14182579 | -0.77245098 | -0.40530724 |
|                                                                               | H  | -3.41383093 | -1.51122076 | 0.16279795  |
|                                                                               | H  | 0.15164549  | 2.77297649  | -1.79556449 |
| Ag <sub>1</sub> Cu <sub>3</sub> _2H<br>(Int1)                                 | Cu | 0.01118499  | 1.45009595  | -0.00005403 |
|                                                                               | Cu | -2.11642242 | 0.25164947  | 0.00004565  |
|                                                                               | Cu | 2.13166815  | 0.30744331  | 0.00004966  |
|                                                                               | Ag | 0.06112552  | -1.25020941 | -0.00002736 |
|                                                                               | H  | -1.67914500 | 1.87884767  | 0.00000335  |
|                                                                               | H  | -1.96024556 | -1.38547864 | 0.00008496  |
| Ag <sub>1</sub> Cu <sub>3</sub> _2H<br>(TS)                                   | Cu | 2.51551430  | -0.01527870 | 0.00001708  |
|                                                                               | Cu | 0.28959920  | 1.10120901  | -0.00003319 |
|                                                                               | Cu | 0.32888630  | -1.26088389 | -0.00001325 |
|                                                                               | Ag | -1.99088644 | 0.01599234  | 0.00001259  |
|                                                                               | H  | 1.80746034  | 1.71422847  | 0.00011673  |
|                                                                               | H  | 0.87820778  | 2.60778547  | 0.00014324  |
| Ag <sub>1</sub> Cu <sub>3</sub> _H <sub>2</sub><br>(Int3)                     | Cu | 2.51629965  | -0.08261558 | -0.00095255 |
|                                                                               | Cu | 0.37335256  | 1.12815708  | -0.00002578 |
|                                                                               | Cu | 0.32979722  | -1.19379637 | 0.00069779  |
|                                                                               | Ag | -2.00058240 | -0.03464094 | -0.00003735 |
|                                                                               | H  | 0.71795060  | 2.97451694  | 0.00499625  |
|                                                                               | H  | -0.05461125 | 2.95299854  | 0.00489507  |

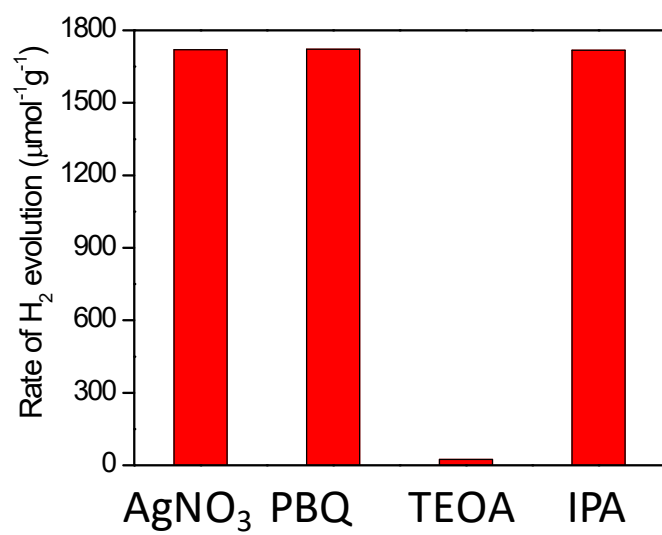

Figure S3. Effect of radical scavenger on hydrogen evolution reaction.



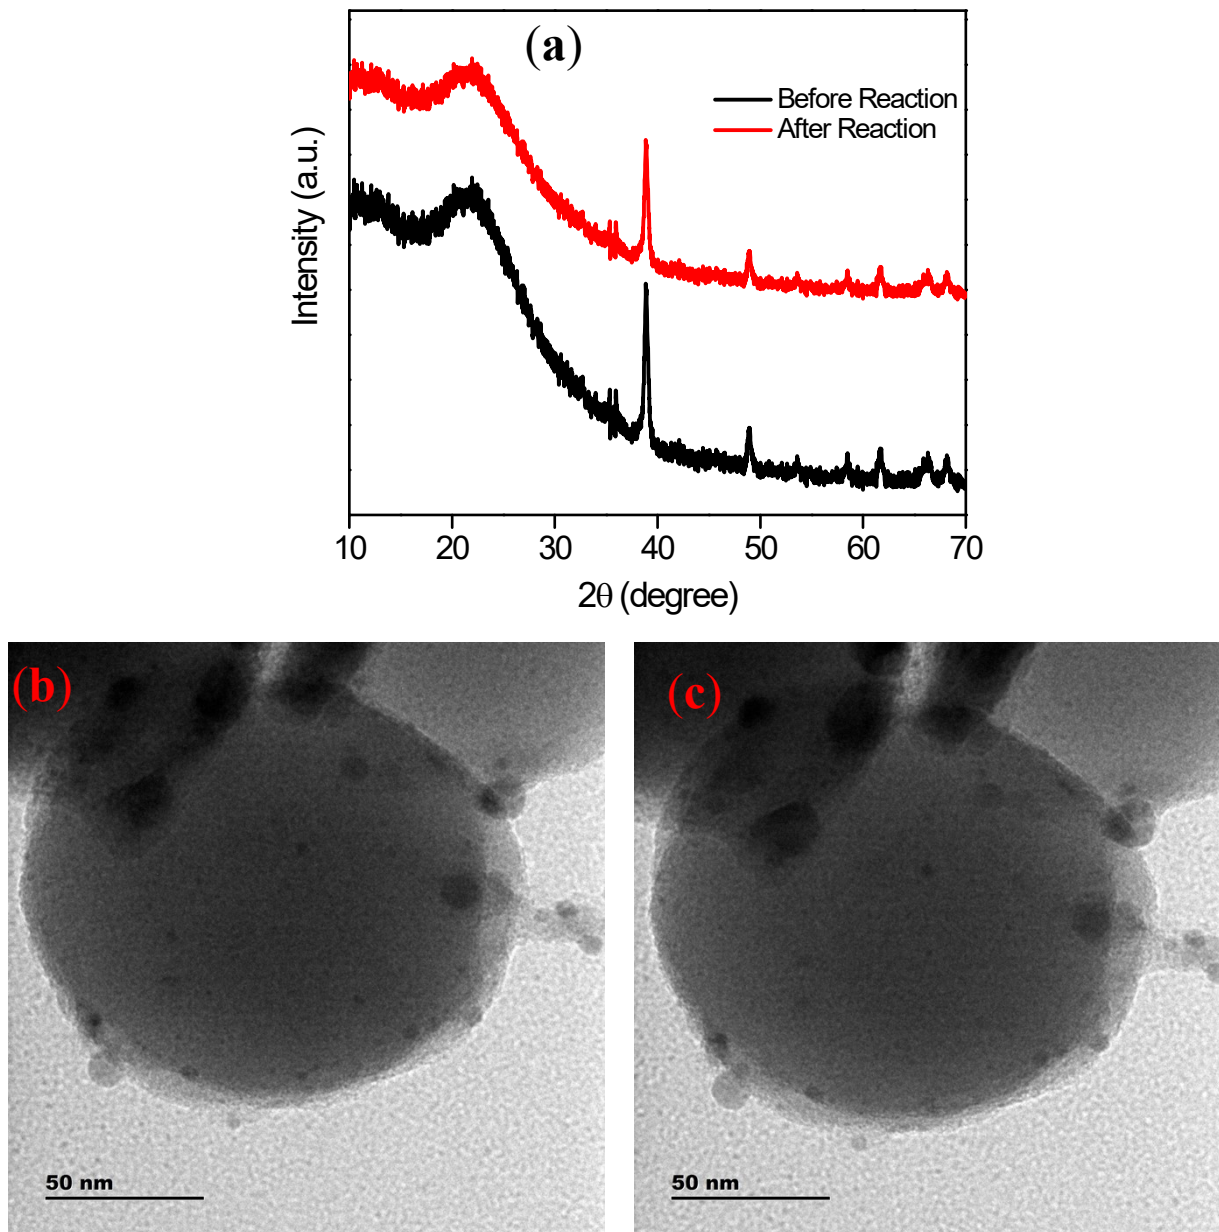

Figure S4. (a) PXRD of SCSC-1:3 before and after photocatalytic reaction, (b,c) HRTEM image of SCSC-1:3 before and after photocatalytic reaction suggesting the crystal phase and morphology remain intact after the reusability test.

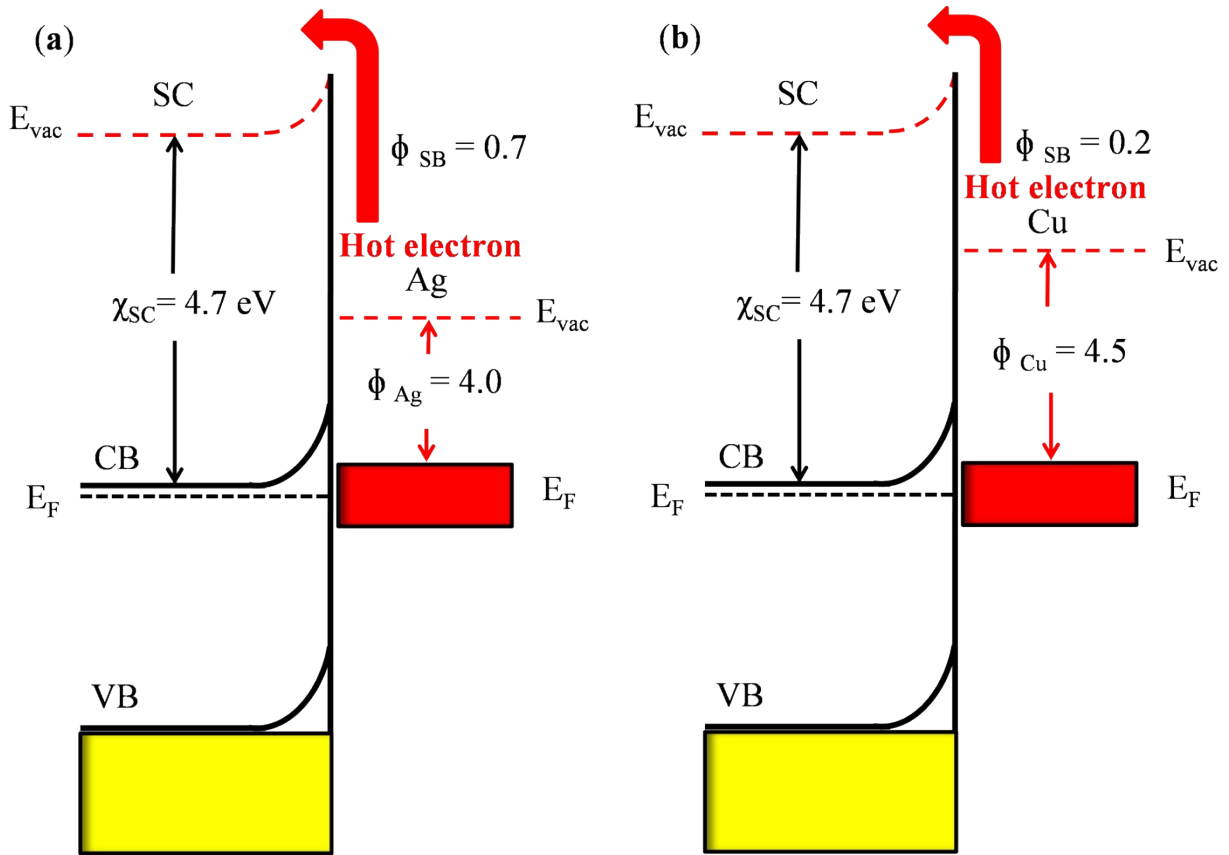

Scheme S1. (a) Energy band diagram of SCS and SCC, where  $E_F$ ,  $E_{vac}$ ,  $\chi_{SC}$ , CB, VB,  $\phi_{SB}$ ,  $\phi_{Ag}$ ,  $\phi_{Cu}$  represents the Fermi energy level, vacuum energy level, electronegativity of conduction band of SC, conduction band and valance band of SC, Schottky barrier height, and work function of Ag and Cu on monometallic form.

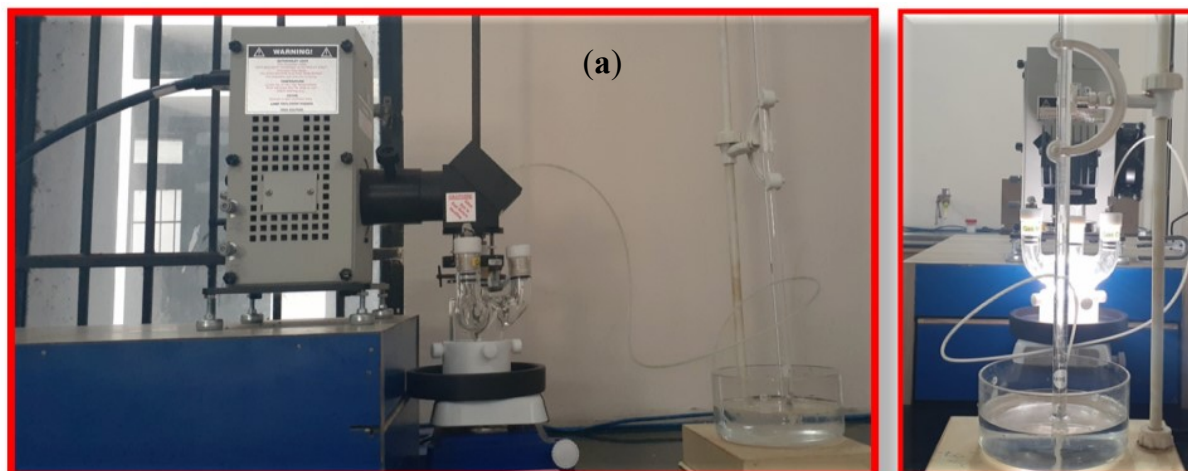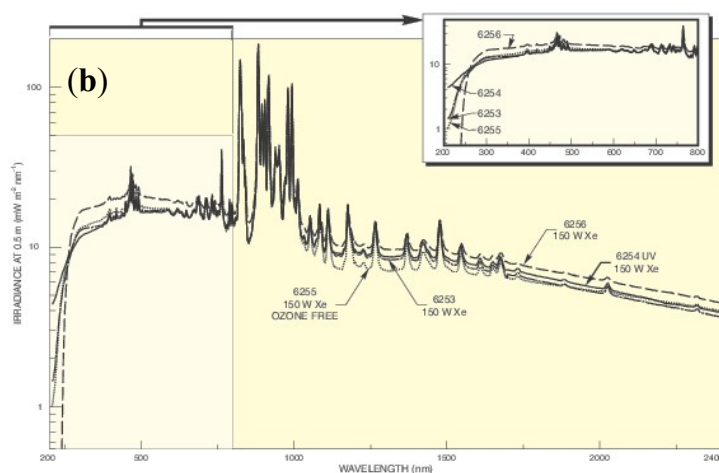

Figure S5. (a) photocatalytic reactor for water splitting reaction, (b) Spectral pattern of 150W Xenon lamp.

## References

1. Zhang, Y.; Wang, L.; Kong, X.; Jiang, H.; Zhang, F.; Shi, J. Novel Ag-Cu bimetallic alloy decorated near-infrared responsive three-dimensional rod-like architectures for efficient photocatalytic water purification. *J. Colloid Interface Sci.* **2018**, *522*, 29-39 10.1016/j.jcis.2018.02.005.
2. Liu, Z.; Huang, Y.; Xiao, Q.; Zhu, H. Selective reduction of nitroaromatics to azoxy compounds on supported Ag-Cu alloy nanoparticles through visible light irradiation. *Green Chem.* **2016**, *18* (3), 817-825 10.1039/C5GC01726B.

3. Bhavani, K.; Naresh, G.; Srinivas, B.; Venugopal, A. Plasmonic resonance nature of Ag-Cu/TiO<sub>2</sub> photocatalyst under solar and artificial light: Synthesis, characterization and evaluation of H<sub>2</sub>O splitting activity. *Appl. Catal., B* **2016**, *199*, 282-291  
10.1016/j.apcatb.2016.06.050.
4. Wu, W.; Lei, M.; Yang, S.; Zhou, L.; Liu, L.; Xiao, X.; Jiang, C.; Roy, V.A. A one-pot route to the synthesis of alloyed Cu/Ag bimetallic nanoparticles with different mass ratios for catalytic reduction of 4-nitrophenol. *J. Mater. Chem. A* **2015**, *3* (7), 3450-3455  
10.1039/C4TA06567K.
5. He, L.; Liu, C.; Tang, J.; Zhou, Y.; Yang, H.; Liu, R.; Hu, J. Self-catalytic stabilized Ag-Cu nanoparticles with tailored SERS response for plasmonic photocatalysis. *Appl. Surf. Sci.* **2018**, *434*, 265-272  
10.1016/j.apsusc.2017.10.155.
6. Umer, M., Tahir, M., Azam, M.U. and Jaffar, M.M., Metals free MWCNTs@ TiO<sub>2</sub>@ MMT heterojunction composite with MMT as a mediator for fast charges separation towards visible light driven photocatalytic hydrogen evolution. *Applied Surface Science*, **2019**, *463*, 747-757. 10.1016/j.ijhydene.2017.09.116
7. Tahir, M. Ni/MMT-promoted TiO<sub>2</sub> nanocatalyst for dynamic photocatalytic H<sub>2</sub> and hydrocarbons production from ethanol-water mixture under UV-light. *International Journal of Hydrogen Energy*, **2017**, *42*, 47, 28309-28326.  
10.1016/j.ijhydene.2017.09.116
